# Supplementary material for: Origins of stereoselectivity in the chelation-controlled addition of alkyl radicals to α-methylene-γ-oxycarboxylic acid esters
Source: Royal Society of Chemistry journal article supplement (doi:10.1039/b205613p), 2002-01-01

## Supplementary data

Electronic Supplementary Information

Paper Ref.: B205613P

Title : Origins of stereoselectivity in the chelation-controlled addition of alkyl radicals to  $\alpha$ -methylene- $\gamma$ -oxycarboxylic acid esters.

Hajime Nagano,\* Satoko Toi, Mikako Matsuda, Tamano Hirasawa, Satomi Hirasawa and Tomoko Yajima

Department of Chemistry, Faculty of Science, Ochanomizu University,  
Otsuka, Bunkyo-ku, Tokyo 112-8610, Japan.

[1] The heats of formation (kcal mol<sup>-1</sup>) for **51**, **53–59**, **66**, and **67**.

**51A-1** (-236.6), **51A-2** (-235.3), **51A-3** (-234.5),

**53A-1** (-241.1), **53A-2** (-241.0), **53A-3** (-240.5)

**54A-1** (-184.7), **54A-2** (-183.4)

**56B-1** (-196.4)

**57B-1** (-261.5), **57B-2** (-260.5), **57B-3** (-260.0)

**58B-1** (-264.6), **58B-2** (-264.0), **58B-3** (-263.1)

**59B-1** (-146.4), **59B-2** (-146.2), **59B-3** (-135.4)

**66B-1** (-140.1), **66B-2** (-139.5)

**67B-1** (-216.3), **67B-2** (-216.1), **67B-3** (-216.0), **67B-4** (-215.9)

[2] Low energy conformers and their heats of formation (kcal mol<sup>-1</sup>) for **46A**

(Fig. S1), **46B–46D** (Fig. S2), **47A** (Fig. S3), **48B** (Fig. S4), **49B** (Fig. S5),

**50A**,/**50B** (Fig. S6), **51A-3** (Fig. S7), **52A** (Fig. S8), **55B** (Fig. S9), **68B** (Fig.

S10) and **69B**(Fig. S11).

Global minimum energy conformers for the intermediate model in the ethyl

## **Supplementary data**

radical addition to compound **4** (Fig. S12).

## Supplementary data

Fig. S1 Low energy conformers of **46A** and their heats of formation ( $\text{kcal mol}^{-1}$ )

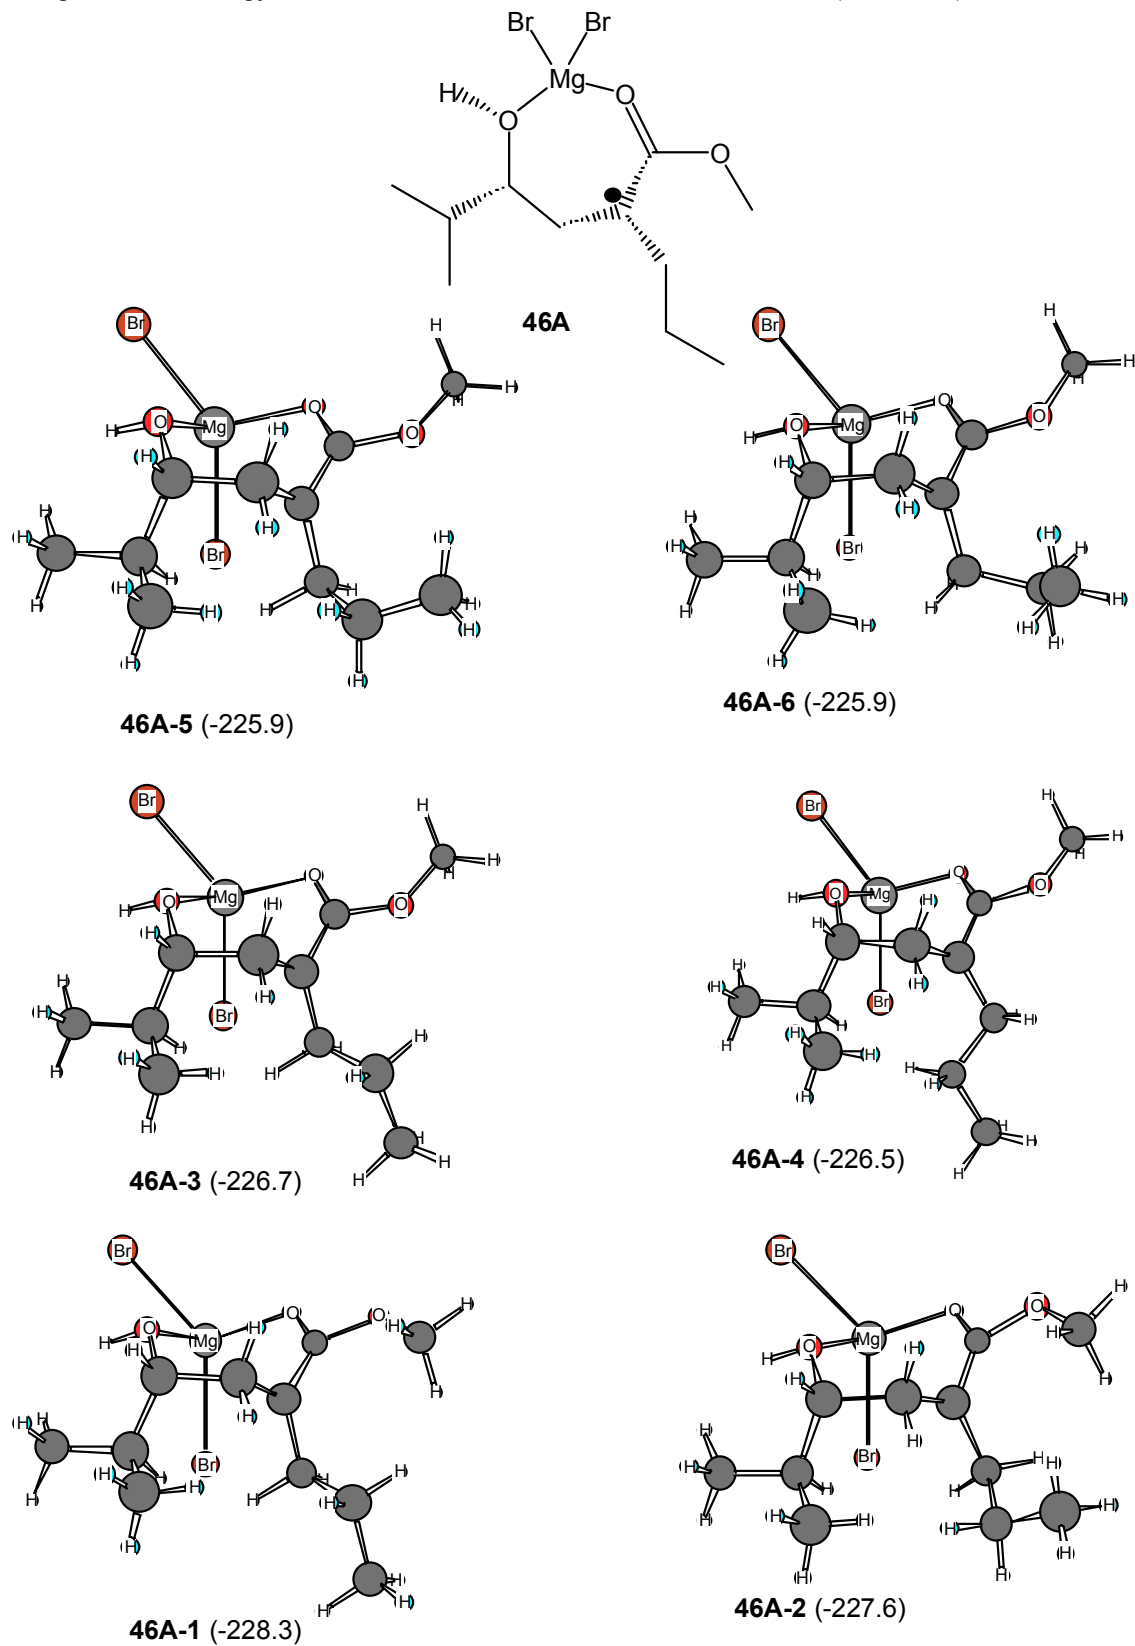

## Supplementary data

Fig. S2 Low energy conformers of **46B**, **46C** and **46D** and their heats of formation (kcal mol<sup>-1</sup>)

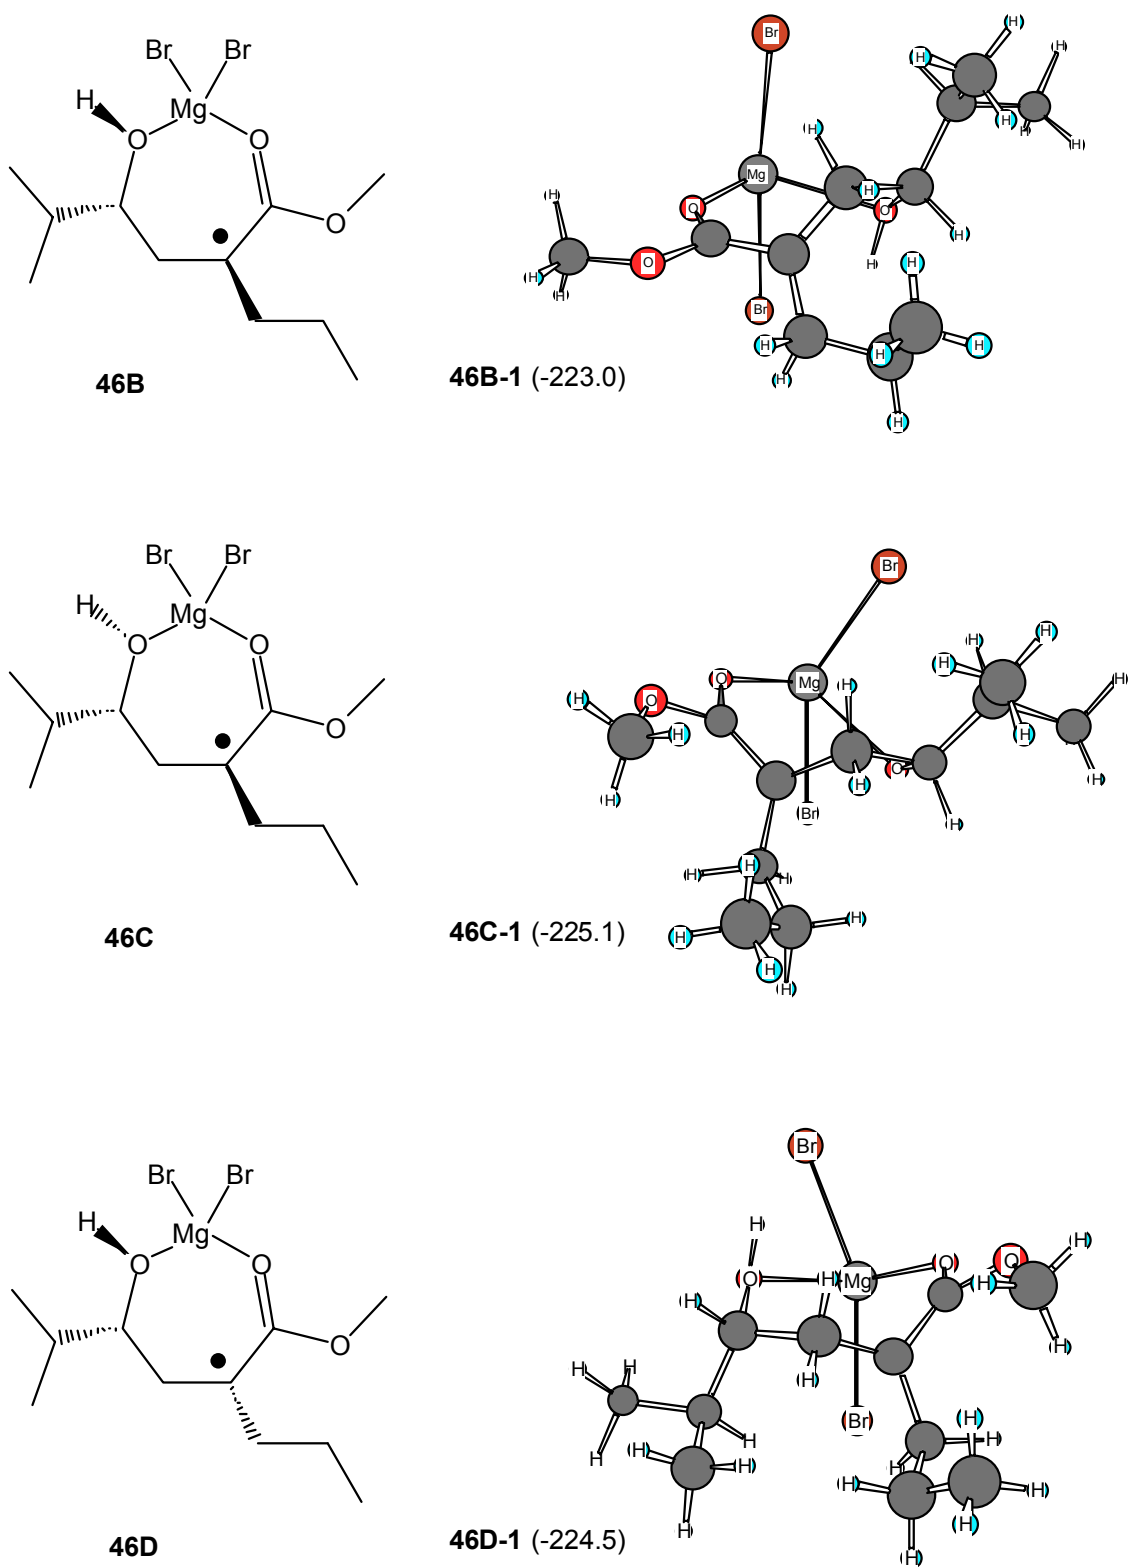

## Supplementary data

Fig. S3 Low energy conformers of **47A** and their heats of formation ( $\text{kcal mol}^{-1}$ )

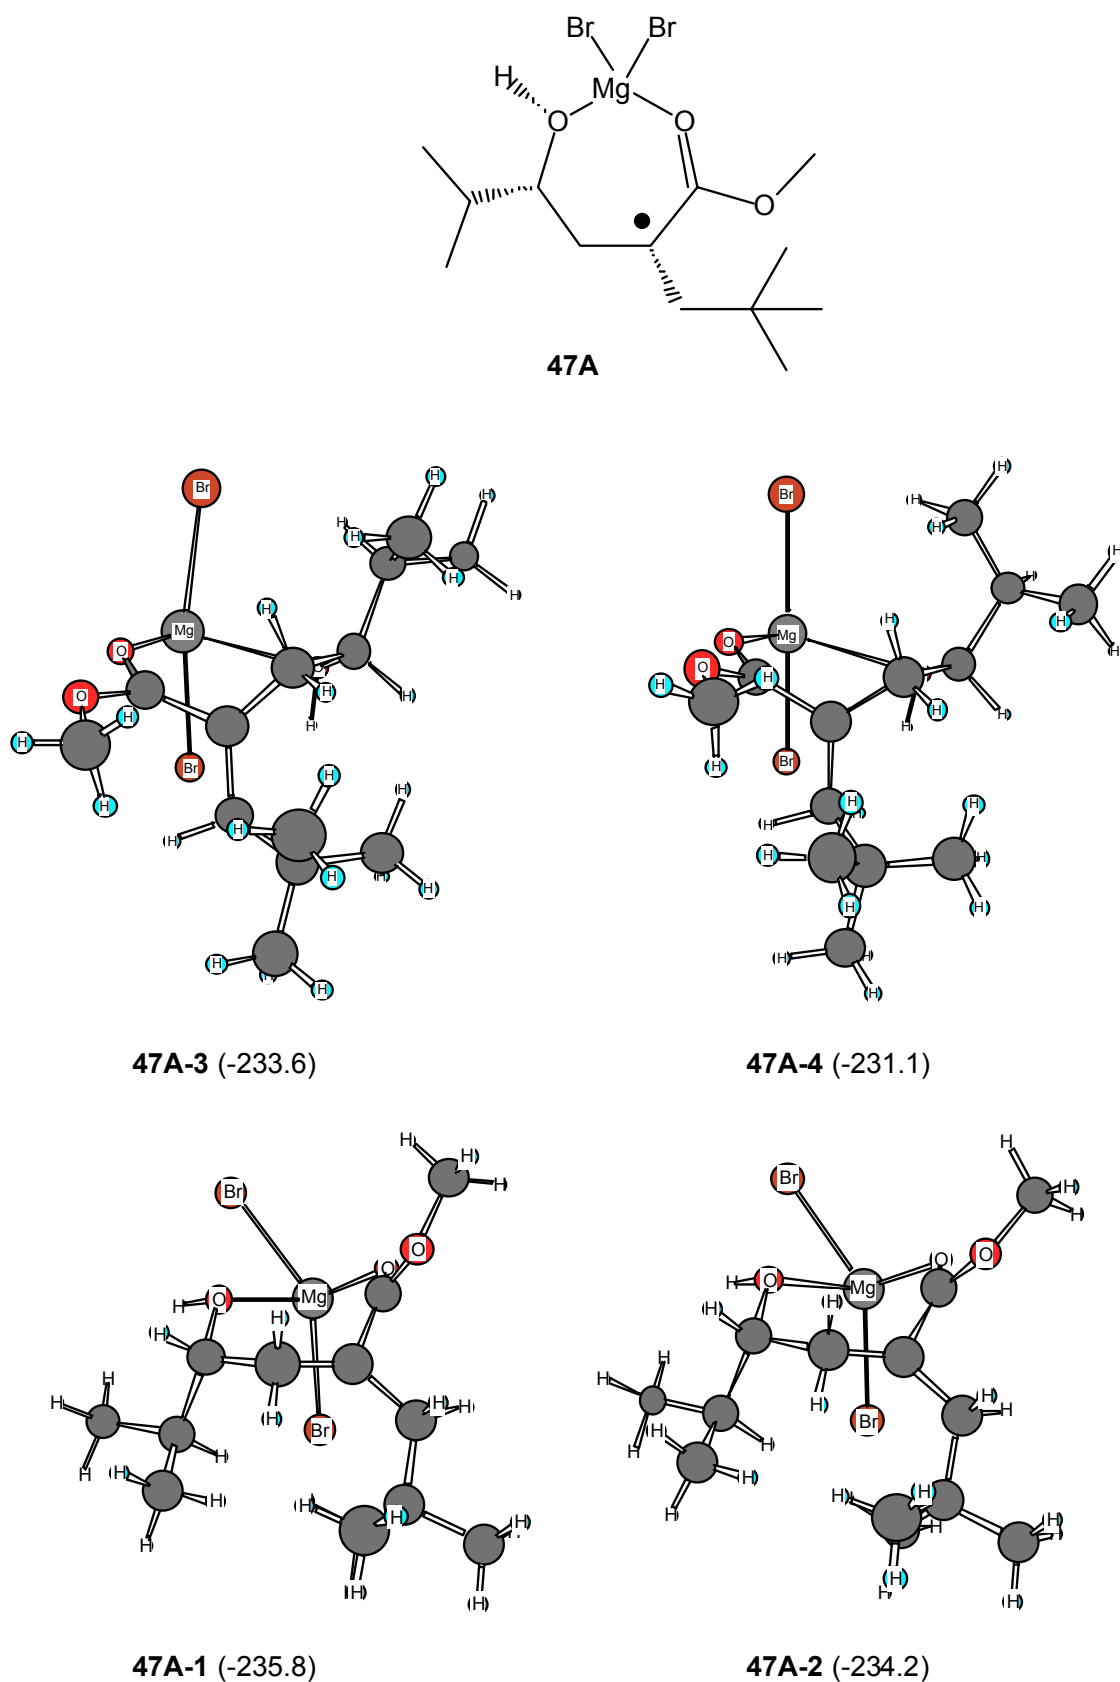

## Supplementary data

Fig. S4 Low energy conformers of **48B** and their heats of formation ( $\text{kcal mol}^{-1}$ )

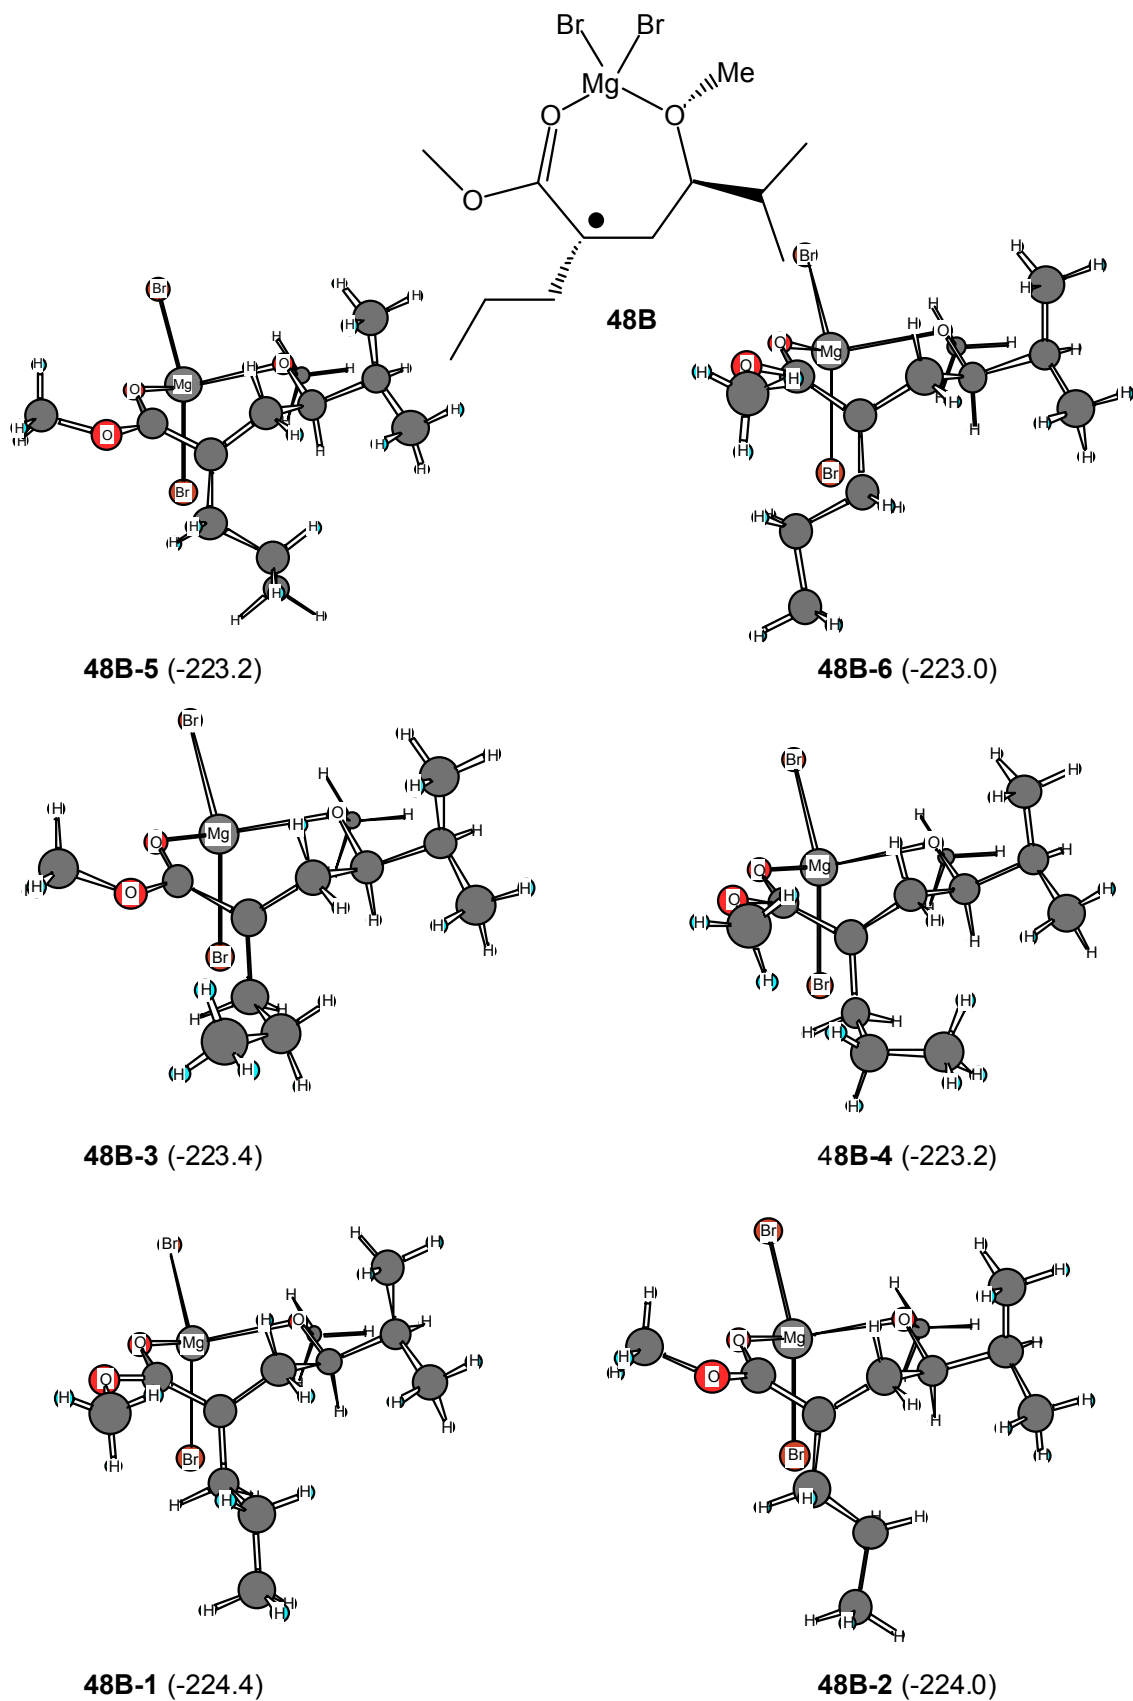

## Supplementary data

Fig. S5 Low energy conformers of **49B** and their heats of formation ( $\text{kcal mol}^{-1}$ )

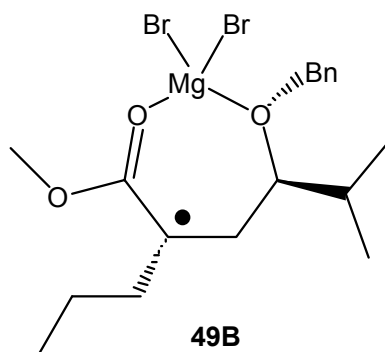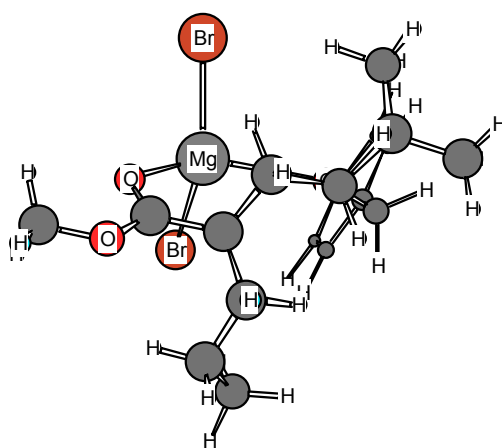

**49B-3** (-182.3)

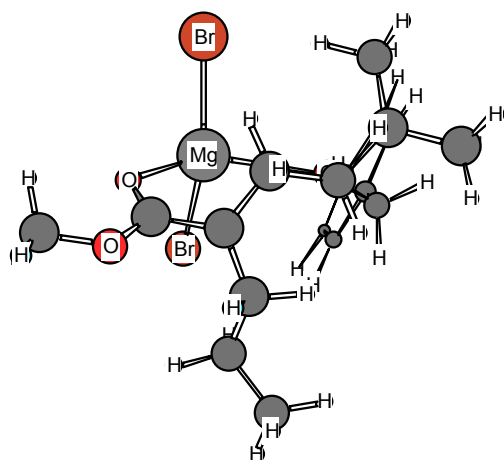

**49B-1** (-183.6)

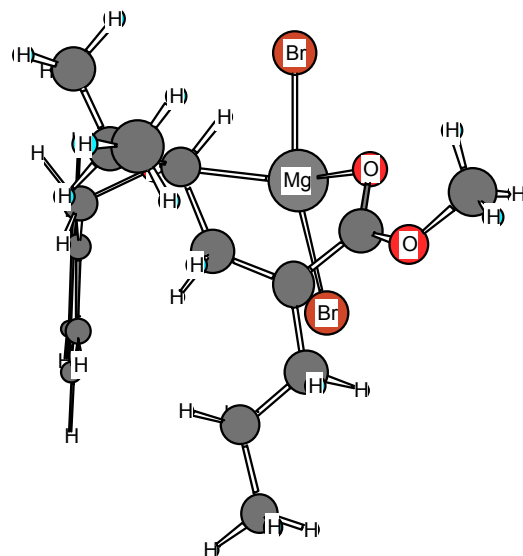

**49B-2** (-182.6)

## Supplementary data

Fig. S6 Low energy conformers of **50A** and **50B** and their heats of formation ( $\text{kcal mol}^{-1}$ )

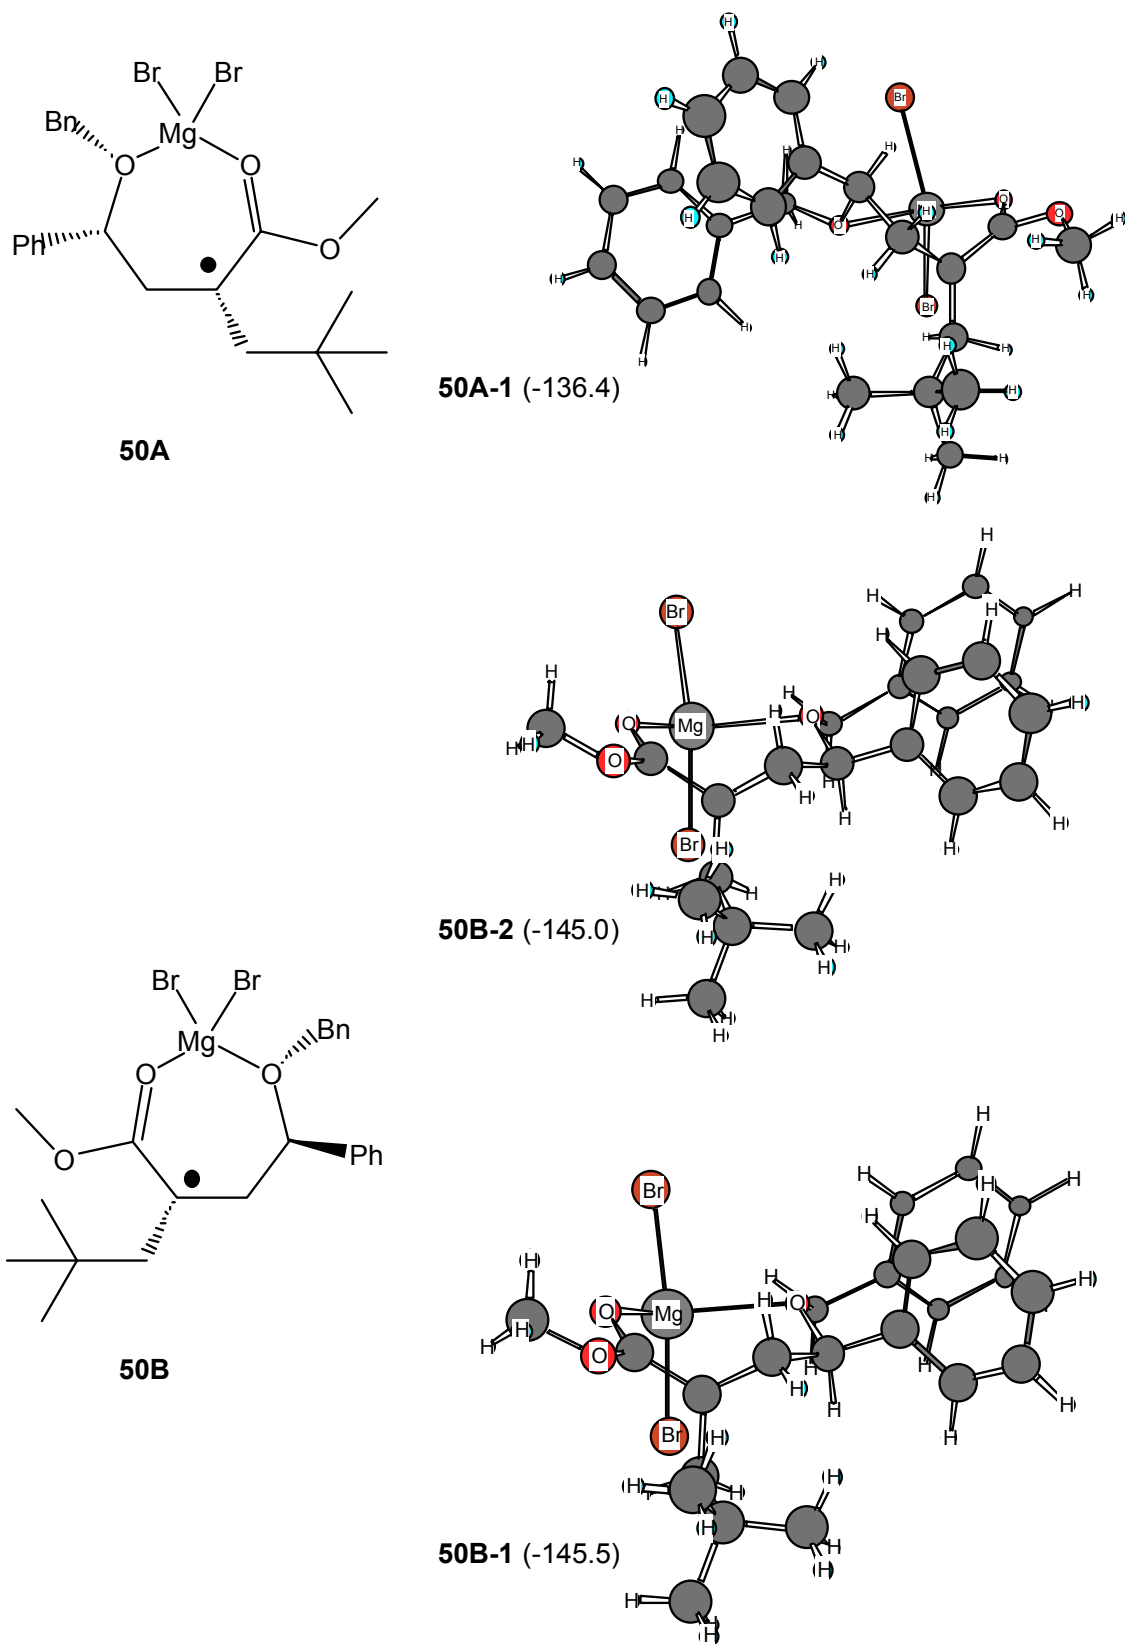



## Supplementary data

Fig. S7 Low energy conformer **52A-3** and its heat of formation (kcal mol<sup>-1</sup>)

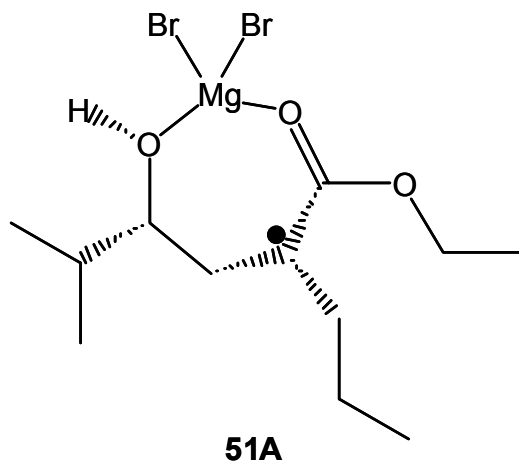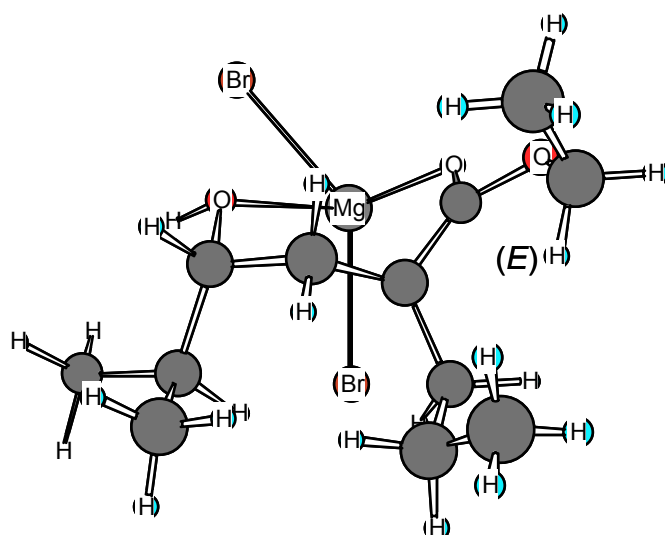

**51A-3** (-234.5)

Supplementary Material for Perkin Transactions 1  
This journal is © The Royal Society of Chemistry 2002

## **Supplementary data**

## Supplementary data

Fig. S8 Low energy conformers of **52A** and their heats of formation ( $\text{kcal mol}^{-1}$ )

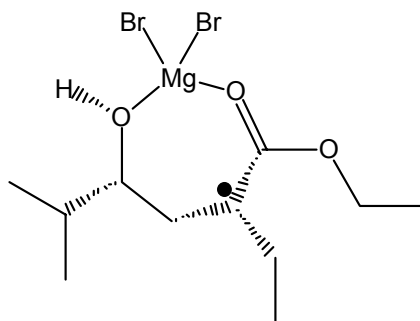

**52A**

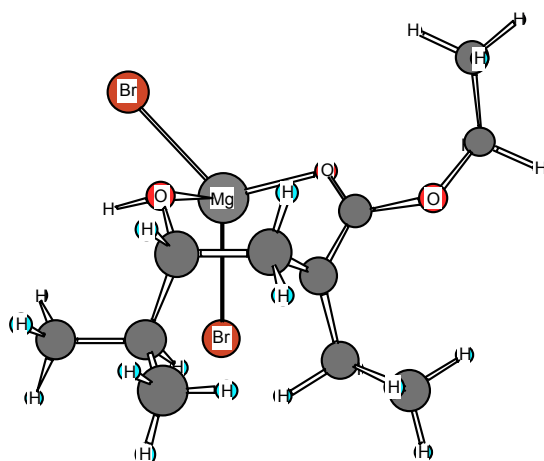

**52A-3** ( $-226.6$ )

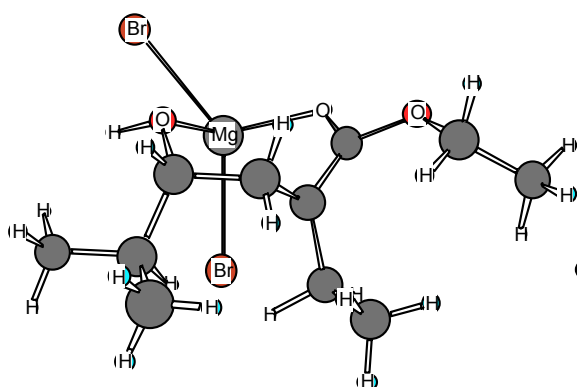

**52A-1** ( $-227.5$ )

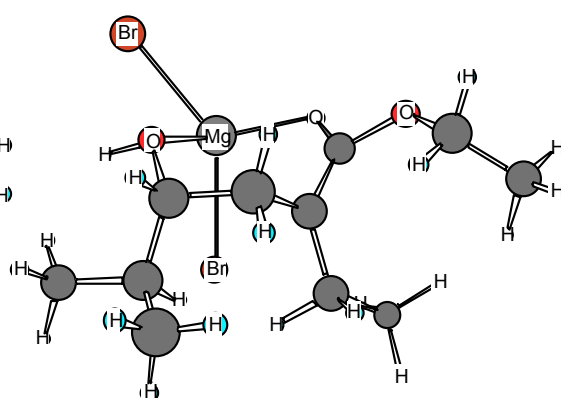

**52A-2** ( $-226.9$ )

## Supplementary data

Fig. S9 Global minimum energy conformers of **55B** and its heat of formation (kcal mol<sup>-1</sup>)

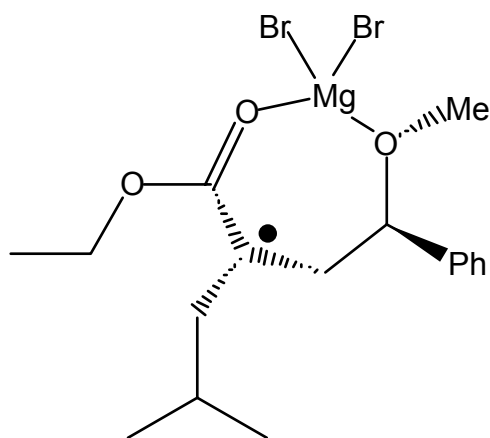

**55B**

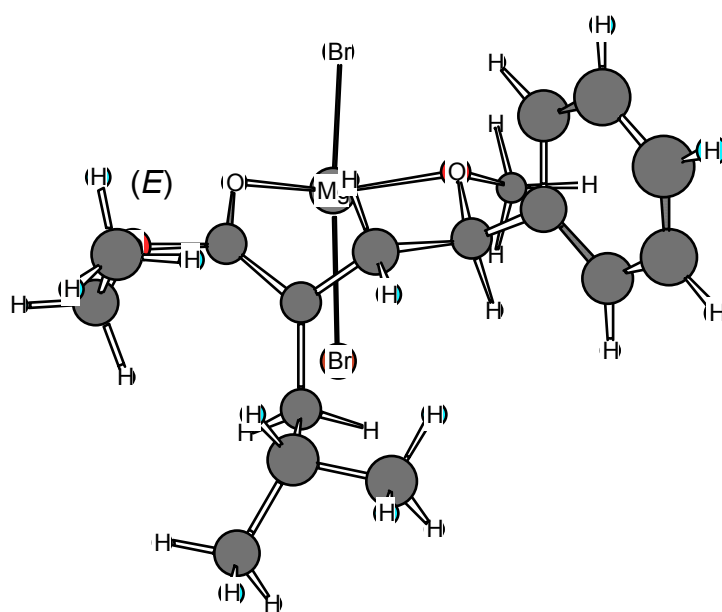

55B-1 (-192.0)

## Supplementary data

Fig. S10 Low energy conformers of **68B** and their heats of formation ( $\text{kcal mol}^{-1}$ )

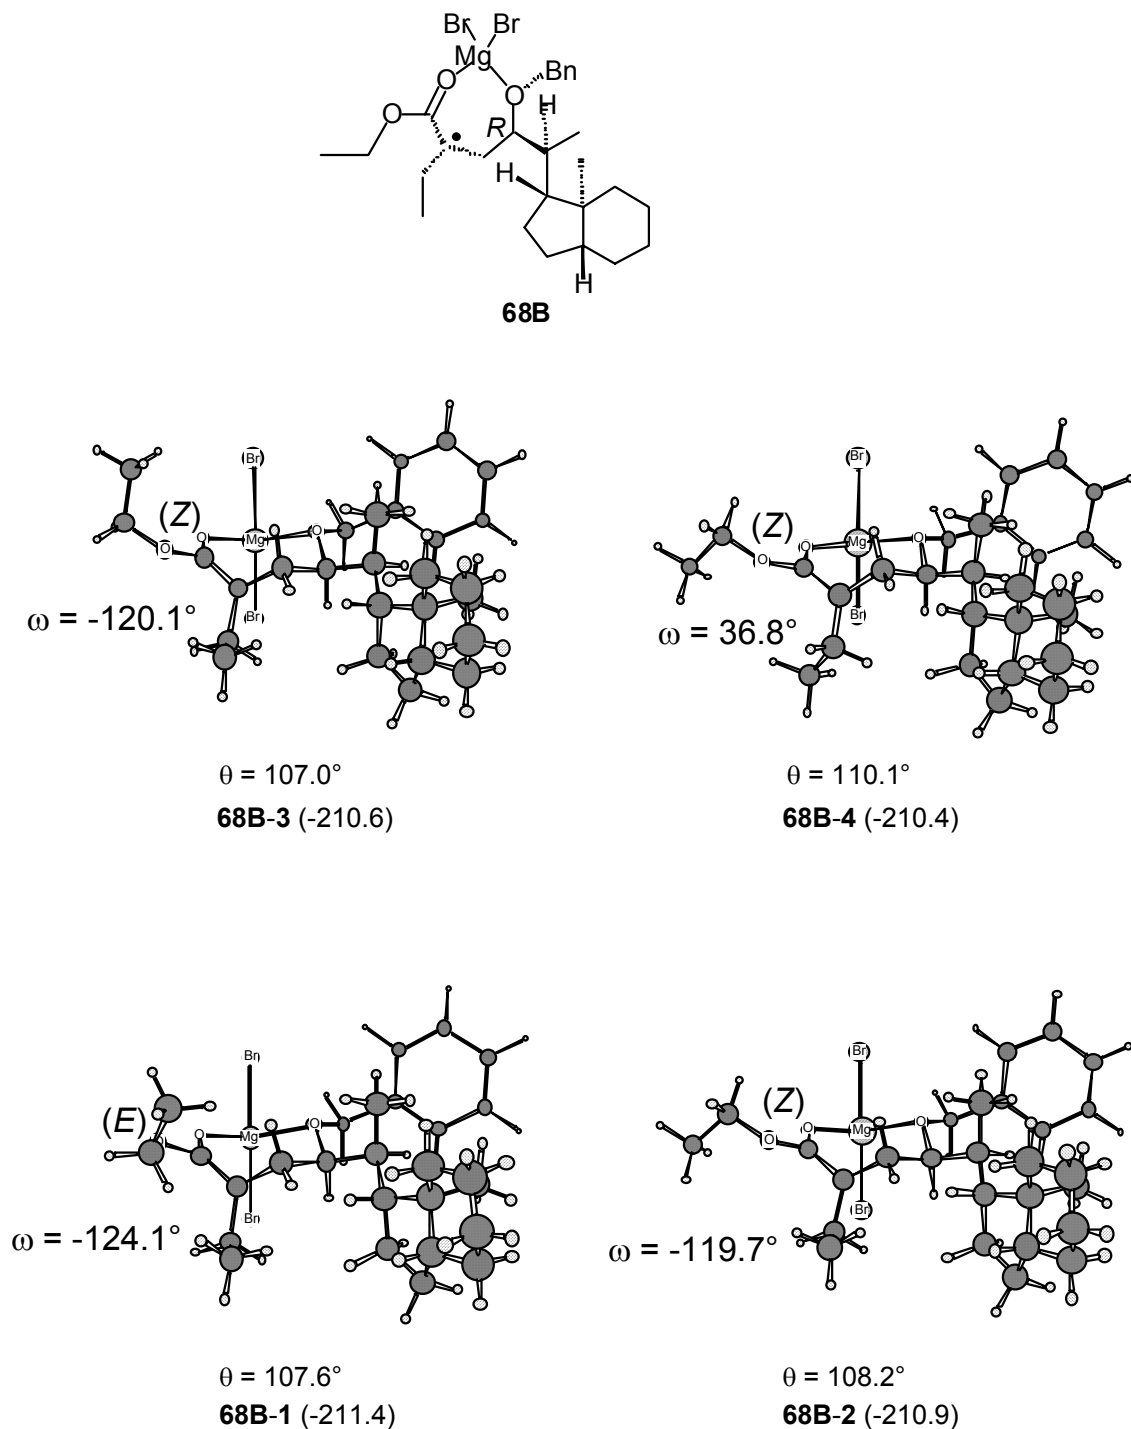

## Supplementary data

Fig. S11 Global minimum conformer **69B-1** and its heat of formation ( $\text{kcal mol}^{-1}$ )

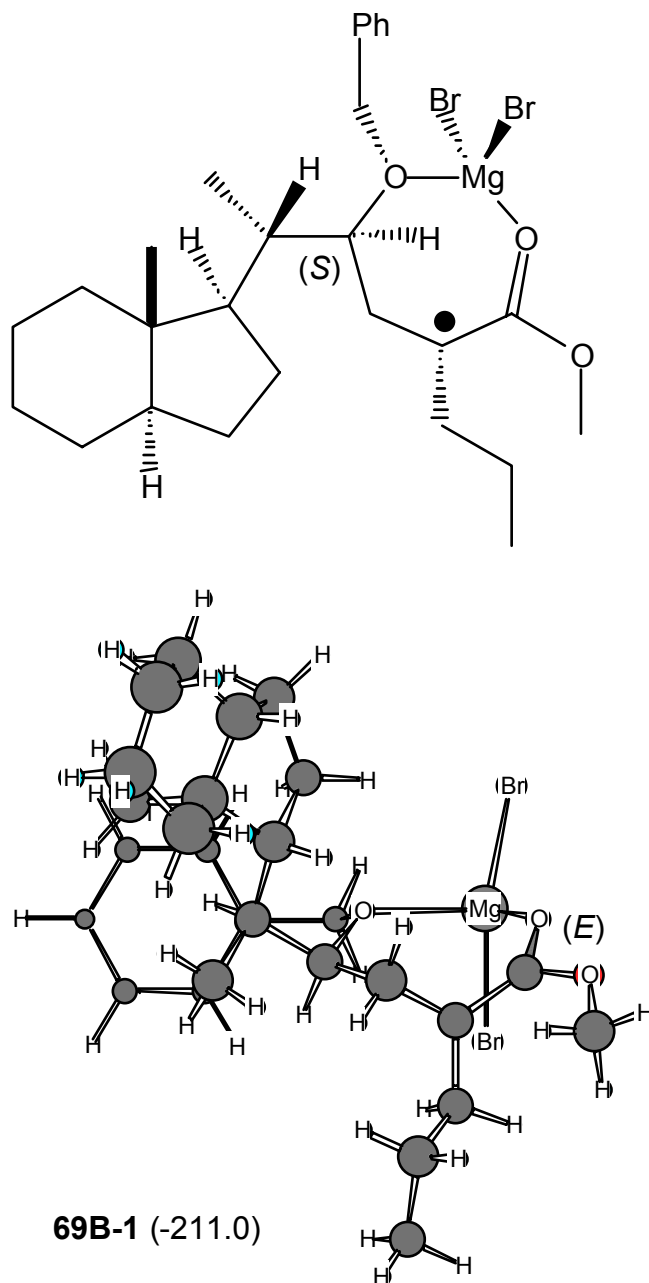

## Supplementary data

Fig. S12. Global minimum energy conformers for the model in the ethyl radical addition to compound **4**

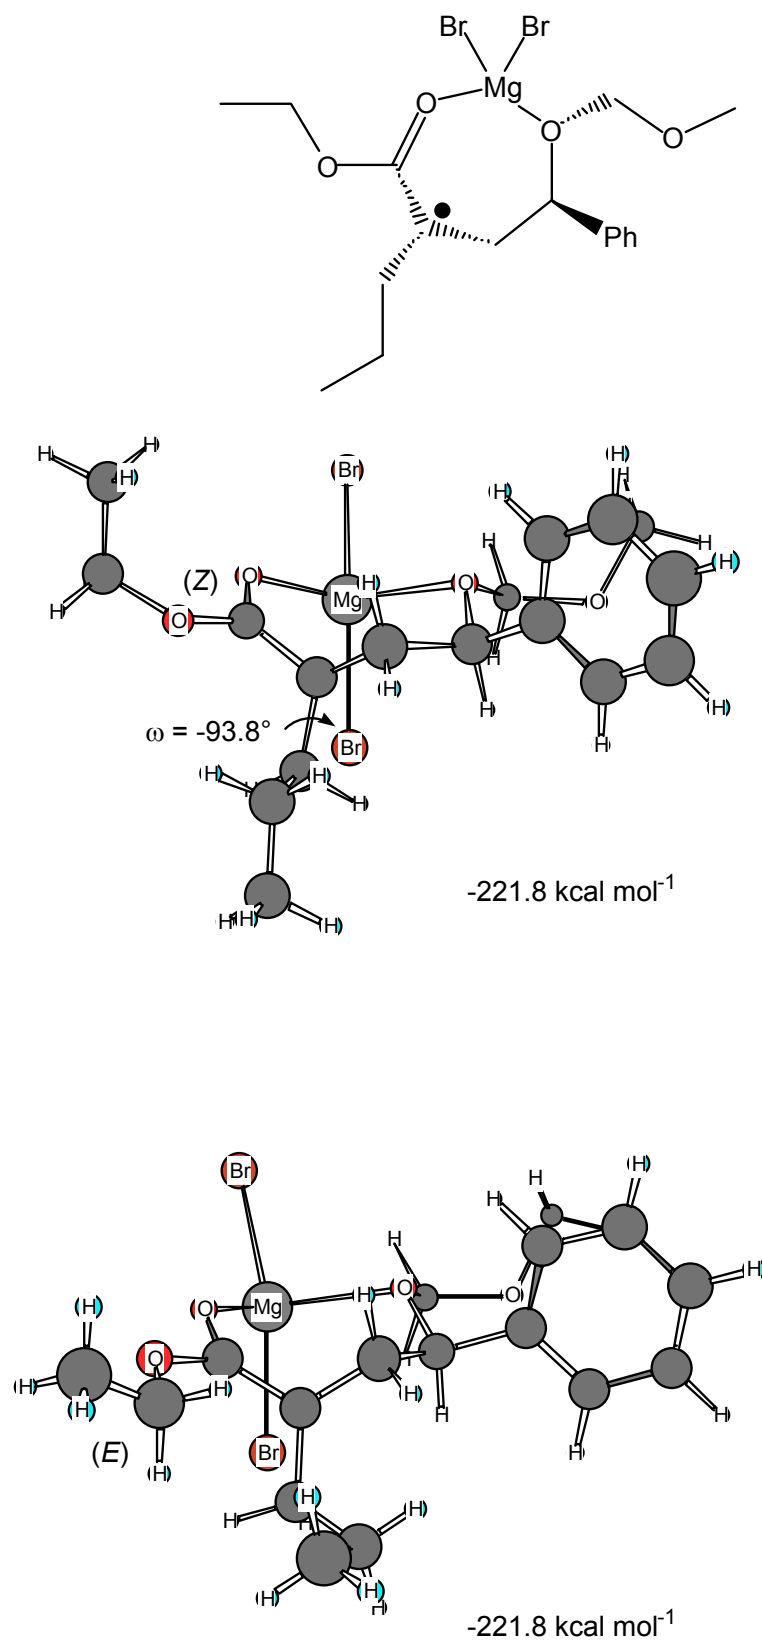

Supplement: b205613p.pdf [file b205613p.pdf]
